# Supplementary material for: Glucoregulatory Properties of a Protein Hydrolysate from Atlantic Salmon (Salmo salar): Preliminary Characterization and Evaluation of DPP-IV Inhibition and Direct Glucose Uptake In Vitro
Source: MDPI journal article supplement (doi:10.3390/md22040151), 2024-03-28
Supplement: s1 [file s1]

# PeptideRanker

Your query (ID 171084754113809) has been processed (19.03.2024).

Response:

|          |                           |
|----------|---------------------------|
| 0.964729 | GPPGPPGPPGPPGPPGGGFD      |
| 0.930727 | GPPGPPGSSSGPQGF           |
| 0.909966 | GPAGPNGPAGGRGGLGPA        |
| 0.899642 | GPAGPHGPPGKDGRAGGHG       |
| 0.889048 | GPRGPPGPPGSSSGPQGF        |
| 0.873021 | GPSGERGPPGPMGPPGLA        |
| 0.846923 | GPPGPPGSSSGPQG            |
| 0.819015 | GPVGPAGKSGDRGESGPAGPA     |
| 0.809429 | GPVGPAGKSGDRGESGPAGPAG    |
| 0.805951 | PGPGGPQGEFGAVGPAG         |
| 0.791772 | MGPRGPPGPPGSSSGPQGF       |
| 0.782283 | LGPTGPIGTGPMGPR           |
| 0.782179 | GLPGGPGAVGEPGRLGPA        |
| 0.781425 | GPAGPRGPSGPA              |
| 0.78115  | KAADTFNFKTF               |
| 0.778331 | GPSGPAGARGDKGEAGEAGER     |
| 0.776344 | GPPGPPGSSSGPQ             |
| 0.771791 | GPRGPPGPPGSSSGPQG         |
| 0.759302 | SSYGGANRGMGGGFGAGGGGGSY   |
| 0.750221 | GASGPAGPRGPSGSAGAA        |
| 0.746106 | PGPGGPQGEHGQIGPAG         |
| 0.740213 | GPMGPRGPPGPPGSSSGPQG      |
| 0.729904 | GEPGKQGPGGPSGERGPPGPM     |
| 0.729846 | GPSGPAGPSGESGPA           |
| 0.727939 | SSGGQAQQGPMGPMGPR         |
| 0.722902 | TGPPGEPGEAGSSSGPMGPR      |
| 0.720204 | SGESGPAGASGPAGPR          |
| 0.698244 | SAGGGAGGAGAGAGGGSVARGA    |
| 0.693342 | GPTGPPGAPGFPGGAGAK        |
| 0.691649 | GPRGPPGPPGSSSGPQ          |
| 0.688174 | GDRGDQGVKGADGAGGKDGIRG    |
| 0.683052 | SGGGQAQMGPMGPMGPRG        |
| 0.680767 | FTGPPGEPGEAGSSSGPMGPR     |
| 0.666412 | GPMGPRGPPGPPGSSSGPQ       |
| 0.661017 | PGPGGPQGEHGQIGPA          |
| 0.659388 | GESGPAGPAGPNGPAGGRGGLGPA  |
| 0.65547  | GPAGGQGEKGEGGPAGPN        |
| 0.645763 | GPMGPMGPRGPPGPPGSSSGPQ    |
| 0.644583 | GPPGPPGPPGPPGPPGGGFDM     |
| 0.639159 | MGPRGPPGPPGSSSGPQG        |
| 0.639116 | PGPGGPQGEHGQIGP           |
| 0.638675 | GEPGKQGPGGPSGERGPPGPMGPPG |
| 0.630867 | SGPAGPAGPNGPAGGRGGLGPA    |
| 0.618146 | GPAGARGADGSTGPAGPAGPL     |
| 0.609093 | RGPPGPPGSSSGPQ            |
| 0.608775 | GPAGAQQEKGEGGPAGPN        |
| 0.604673 | GFTGPPGEPGEAGSSSGPM       |
| 0.595796 | GPAGARGADGSTGPAGPAGPLG    |
| 0.591814 | GFTGPPGEPGEAGSSSGPMGPR    |
| 0.581004 | GEKGQPGGDGPNGPSGTPGPQ     |
| 0.577045 | FTGPPGEPGEAGSSSGPM        |
| 0.557906 | GLTGPAQPQGARGFQGETGIQ     |
| 0.557057 | MGPRGPPGPPGSSSGPQ         |

0.547469 FSGLDGA KGETGPAGPKGEAG  
0.535769 GMTGSPGSPGPDGKVGPA  
0.5234 LRGDPGPGGPQGEHQIGPA  
0.521516 WAAFPD VAGNV DYKQ  
0.521043 GPAGSPGDKGETGAPGAVGPS  
0.515051 GHGGLQGMPPGPNGPSGETGSAG  
0.505036 SGESGPAGASGPAGPRGPSGSAG  
0.497159 GPAGARGADGSTGPAGPAGP  
0.483323 NWDDMEKIWHH  
0.482102 GESGPAGASGPAGPRGPSGSAGAA  
0.480255 GSRGEPGNPGPAGAAGPS  
0.475757 FSGLDGA KGESGPAGPKGEAGAS  
0.47384 GTEASGTGNMKFM  
0.473292 SGLDGA KGETGPAGPKGEAGAS  
0.46315 GYTGATGATGLTGPAGPQGARGF  
0.452053 FSDEEEFPDLSLH  
0.451784 EALGDKAKFAGK  
0.435222 GERGEQGAGGPPGFQ  
0.419701 SGESGPAGASGPAGPRGPSGSAGAA  
0.410298 STGEAGATGPAGLRG  
0.409454 FSGLDGA KGETGPAGPKGEAGAS  
0.40943 GARGADGSTGPAGPAGP  
0.404232 AGPAGPAGARGADGSTGPAGPAGPL  
0.403028 GLDASSGELPVVGIR  
0.397305 KEYEPENGKVF  
0.395104 LPYDTPIPGYRNN  
0.394118 ALPYDTPIPGYRNN  
0.379334 GVVGNA GEKGEQGPSGAPGFQ  
0.378089 LEQQVDDLEGSLEQEKKL RMD  
0.377822 ATGATGLTGPAGPQGARGF  
0.368547 LDGA KGESGPAGPKGEAGAS  
0.367079 SMPGPMGPMGPRGPPGPPGSSGPQG  
0.360745 LQMPGPNGPSGETGSA  
0.357719 PANIKWGDAGATY  
0.35649 AGARGADGSTGPAGPAGP  
0.346779 GEEGKRGSTGEVGATGPAGLR  
0.345106 DAGKTFPQHVKSR  
0.33901 GGRSFDNVDTPASAL  
0.334044 HEDYKFGHTK  
0.330889 GSDSLDSAKKEIG  
0.328393 AGGGYDQSGGYDEYR  
0.327242 GQKDSYVGDEAQSKRGIL  
0.32248 DGA KGETGPAGPKGEAGAS  
0.320068 DAGKTFPEHV KSR  
0.31553 YGKDATNVGDEGGFAPNIL  
0.306525 ITGDQLGDLYKSF  
0.302948 GEQIDNLQRVK  
0.301484 IITNWDDMEKIWHH  
0.30112 FDMFDTDGGGDISTK  
0.300186 EMNPPKYDKIEDM  
0.298442 TGPAGPQGARGFQGETGIQ  
0.295713 GFTNDEKIGIY  
0.29555 DEYNKGFLDQL  
0.292514 LDGA KGETGPAGPKGEAGAS  
0.2883 AYE PVWAIGTGKTASPA  
0.288296 AGPAGGGYDQSGGYDEY  
0.283778 AADESTGSVAKRF  
0.278917 GQKDSYVGDEAQSKRGILT  
0.278757 LRGHGGLQGMPPGPNGPSGETGSAG  
0.269936 LDGTENKSKFGAN  
0.269248 AEELKKEQDTSSHLERMKNLE

0.265862 GFTNEEKLGIYK  
0.26388 DFNGDTHSSIFDAGAGIA  
0.263431 IDSELPVDEVFGH  
0.262138 AADGPMKGILGYTEQ  
0.254358 EYDEAGPSIVHRK  
0.253828 SSSSLEKSYELPDGQ  
0.253661 SAETEKELANMK  
0.25276 I IHGSDSLDSANKEIAL  
0.249465 EISDLNRMIQ  
0.249457 ATESFGPGTIEYRP  
0.247899 AEELKKEQDTSSHLERM  
0.247209 GQKDSYVGDEAQSKRGILT  
0.239792 ELDGTENKSKFGAN  
0.233679 GFTNEEKLGIY  
0.233347 LGSIDVNHEDYKFGHTK  
0.231868 EYDESGPSIVHRK  
0.229719 SYEEALDHLETL  
0.225556 GEQIDNLQR  
0.225257 SEATDELAKAM  
0.221956 SIMDLENDKQQADEKIKKK  
0.215944 GEVDRKLAEKDEEMEIQIKRN  
0.215371 AETLWGVQKELTL  
0.212756 VTWYDNEFGYSNR  
0.210672 MLELDGTENKSKFGAN  
0.209331 SGDLEELKNVTNN  
0.208392 KNSYEEALDHL  
0.208336 GEQIDNLQRVKQK  
0.206164 LQSAETEKELANMK  
0.206153 LNDQHLGKTK  
0.202868 GTGEFSEPSVEIEPVEKL  
0.201883 TADQIEDFKEAF  
0.201552 NVLSGGTTMYPGIADRM  
0.199498 VLGNSGLTDVIHM  
0.199461 GVKGERGNSGPAGSAGSQ  
0.196848 NSYEEALDHLETL  
0.194672 ENDKQQADEKIKKKEFETT  
0.191105 GTEFMQDPDVEHL  
0.189142 LGQNPQNKEVAAI  
0.188573 GARQQEGESRLN  
0.188189 EAEASLEHEESKIL  
0.18772 EYDEAGPSIVHR  
0.186978 GQKDSYVGDEAQSKRG  
0.183688 VEELKLFLQ  
0.181834 ELLEGKVLPGVDAL  
0.177117 ELKKEQDTSSHLERM  
0.176656 LLQSAETEKELANMK  
0.176592 GVNHEKYDNSLK  
0.175952 NSYEEALDHL  
0.175926 LSKVEDEQSLGAQL  
0.174546 KDSYVGDEAQSKRG  
0.174138 GADTSADLEETGRVL  
0.173645 KNSYEEALDHL  
0.173594 VGSQVSEANLR  
0.171621 LVTWYDNEFGYSNR  
0.170832 DTSADLEETGRVL  
0.167041 TENGEFGRQL  
0.166978 AEELKKEQDTSSHLERMKK  
0.165729 SYVGDEAQSKRG  
0.165635 IIDQNRDGIIS  
0.162679 SGDLEELKNVTN  
0.158324 DTMDRIIQTM

|           |                      |
|-----------|----------------------|
| 0.155714  | LAEKDEEMEQIKRN       |
| 0.155624  | LRIDQSILTGE          |
| 0.155039  | SESLKDAQEKL          |
| 0.154054  | IAMDGTEGLVRGQ        |
| 0.148766  | LQSAETEKELANM        |
| 0.146696  | SKIEDEQSLGAQ         |
| 0.146162  | VGMGQKDSYVGDEAQSKRG  |
| 0.145971  | SKVEDEQSLGAQLQ       |
| 0.142977  | WKQKYEEGQAELEGA      |
| 0.142884  | ETLWGVQKELTL         |
| 0.1421    | AKVIHDNYH            |
| 0.139815  | EAAEGTLEHEEAKIL      |
| 0.136843  | GVVGNAGEKGEQGPS      |
| 0.136801  | GQKDSYVGDEAQSKR      |
| 0.135484  | KVIHDNYH             |
| 0.132405  | AEELKKEQDTSSHLERMKKN |
| 0.131981  | EVKKEVKEEEEVGDWRK    |
| 0.130324  | GYTGATGATGLTGPAQP    |
| 0.130159  | GVNHEKYDNSLKVVS      |
| 0.129206  | LENDKQQADEKIKKK      |
| 0.128406  | NFSHGTHEYHAE         |
| 0.127608  | LLEKEAADLITEK        |
| 0.127089  | DLENDKQQADEKIKKK     |
| 0.126999  | VDHVNKDIAAK          |
| 0.125857  | VDRKLAEKDEEMEQIKRN   |
| 0.12519   | LLSKVEDEQSLGAQ       |
| 0.123158  | SKVEDEQSLGAQ         |
| 0.122966  | AEWKQKYEEGQAELE      |
| 0.121666  | VTGGKSNDDVSGPANQL    |
| 0.119758  | PTETQSDARSF          |
| 0.117163  | GVNHEKYDNSLKVVSNA    |
| 0.116583  | TNEKLQQF             |
| 0.113098  | TDAEQEQLIADHF        |
| 0.112937  | LSKVEDEQSLGAQLQ      |
| 0.112822  | EKDEEMEQIKRN         |
| 0.111447  | KVEDEQSLGAQLQ        |
| 0.107434  | EELEEAKKKLAQR        |
| 0.107353  | EEMEQIKRN            |
| 0.104621  | VVSSDFNGDTHSS        |
| 0.101896  | GRTEHTPEGVKWVDTQ     |
| 0.101605  | EEISERLEEAGGAT       |
| 0.101449  | LIEDTQDWQPRTGTTQ     |
| 0.0990451 | LSKVEDEQSLGAQ        |
| 0.0964986 | GQKDSYVGDEAQSK       |
| 0.0945146 | DISNADRLGSSEVDQVQ    |
| 0.0942321 | IAEEADRKYEE          |
| 0.0937397 | ITGESGAGKTVNTK       |
| 0.0932384 | TLDDLQSEEDKVNTL      |
| 0.0923273 | TLDDLQAEEDKVNTL      |
| 0.0860746 | VGMGQKDSYVGDEAQSK    |
| 0.0858503 | SDLERTEERAELSEGK     |
| 0.0847766 | ELEEEELKNVTNN        |
| 0.0839209 | ISDLTEQIGETGKS       |
| 0.0833431 | KLKGTEDELDKY         |
| 0.0823965 | LQNEIENVKGQ          |
| 0.0793251 | NDENVRQVNDISGQ       |
| 0.0744901 | LEEEELKNVTNN         |
| 0.0718552 | EELEEAKKKLAQ         |
| 0.0715598 | NADRLGSSEVDQVQ       |
| 0.0710519 | ELKKEQDTSSHL         |
| 0.0704079 | KRAIEEEVKAK          |

|           |                       |
|-----------|-----------------------|
| 0.0702853 | METGLTPDQVKKN         |
| 0.0688986 | SELEEEELKTVTN         |
| 0.0652111 | DENVRQVNDISGQ         |
| 0.0651457 | KTIDDLEDELYAQ         |
| 0.0646284 | KTKNDENVRQVNDISGQ     |
| 0.0637462 | LAKVEKEKHATEN         |
| 0.0625328 | LIEEEKKEMKQE          |
| 0.0623686 | ELEEEELKTVTNN         |
| 0.0617897 | ELEEEELKNVTN          |
| 0.060841  | EIQLSHSNRQAEEAQ       |
| 0.0600667 | ENVRQVNDISGQ          |
| 0.0559723 | TLENGNLVQKQ           |
| 0.0553383 | KRQLEEEVKAK           |
| 0.0538266 | TALEEAEGTLEHE         |
| 0.0528499 | ELEEEELKTVTN          |
| 0.0526873 | TEQIGETGKSIHE         |
| 0.0524878 | LEEELKTVTNN           |
| 0.0487858 | LVEEEELDRAQ           |
| 0.0467464 | AYKRHSEEAEEAANQH      |
| 0.0393565 | TKEKKALQEAHQQ         |
| 0.0344744 | EKAKKTVETEKSEIQ       |
| 0.0310724 | VEMEKKLEKGEAIDGMIPAQK |
| 0.0287943 | LKEVKKEVKEEE          |
